# Supplementary material for: Valuation of the EQ-5D-3L in Russia
Source: Springer Nature journal article supplement (doi:10.1007/s11136-021-02804-6), 2021-03-13
Supplement: MOESM1 [file 18963180]

## **Title: Valuation of the EQ-5D-3L in Russia**

Vitaly Omelyanovskiy<sup>1,2,3</sup>, Ph.D.

Nuriya Musina<sup>1,4,5</sup>, Ph.D.

Svetlana Ratushnyak<sup>1</sup>, M.Sc

Tatyana Bezdenezhnykh<sup>1,2</sup>, M.Sc

Vlada Fediaeva<sup>1,2</sup>, M.Sc

Bram Roudijk<sup>6</sup>, Ph.D.

Fredrick Dermawan Purba<sup>7,8</sup>, Ph.D.

1. Center of Healthcare Quality Assessment and Control, Ministry of Health of the Russian Federation, Moscow, Russia
2. Financial Research Institute at the Ministry of Finances of Russian Federation, Moscow, Russia
3. Russian Medical Academy of Continuous Professional Education of the Ministry of Health of the Russian Federation, Moscow, Russia
4. Russian Presidential Academy of National Economy and Public Administration (RANEPA), Moscow, Russia
5. Saint Petersburg State Chemical Pharmaceutical Academy, St. Petersburg, Russia
6. EuroQol Research Foundation, Rotterdam, the Netherlands
7. Faculty of Psychology, Universitas Padjadjaran, Jatinangor, Indonesia
8. Center for Health Technology Assessment, Universitas Padjadjaran, Jatinangor, Indonesia

### **Corresponding author**

Svetlana Ratushnyak

Email: [svetlanarshk@gmail.com](mailto:svetlanarshk@gmail.com)

**Word count:** 3998 words

Table 1. Modeling results of composite time trade-off (cTTO) and discrete choice experiments (DCE) data

| Dimensions with levels                                            | Model 1a:<br>Random intercept<br>(cTTO) |        | Model 1b:<br>Tobit<br>(cTTO) |        | Model 1c:<br>heterosked<br>(cTTO) |        | Model 2:<br>(DCE rescaled <sup>1</sup> ) |        |
|-------------------------------------------------------------------|-----------------------------------------|--------|------------------------------|--------|-----------------------------------|--------|------------------------------------------|--------|
|                                                                   | $\beta(SE)$                             | $p$    | $\beta(SE)$                  | $p$    | $\beta(SE)$                       | $p$    | $\beta(SE)$                              | $p$    |
| Some problems in Mobility                                         | 0.038<br>(0.019)                        | 0.040  | 0.034<br>(0.020)             | 0.088  | 0.038<br>(0.013)                  | 0.153  | 0.066<br>(0.082)                         | <0.001 |
| Severe problems in Mobility                                       | 0.406<br>(0.018)                        | <0.001 | 0.424<br>(0.019)             | <0.001 | 0.438<br>(0.023)                  | <0.001 | 0.455<br>(0.115)                         | <0.001 |
| Some problems in Self-Care                                        | 0.069<br>(0.017)                        | <0.001 | 0.071<br>(0.018)             | <0.001 | 0.056<br>(0.013)                  | <0.001 | 0.076<br>(0.073)                         | <0.001 |
| Severe problems in Self-Care                                      | 0.284<br>(0.018)                        | <0.001 | 0.298<br>(0.019)             | <0.001 | 0.331<br>(0.021)                  | <0.001 | 0.205<br>(0.094)                         | <0.001 |
| Some problems in Usual Activities                                 | 0.072<br>(0.186)                        | <0.001 | 0.070<br>(0.020)             | <0.001 | 0.046<br>(0.013)                  | <0.001 | 0.074<br>(0.082)                         | <0.001 |
| Severe problems in Usual Activities                               | 0.245<br>(0.017)                        | <0.001 | 0.257<br>(0.019)             | <0.001 | 0.262<br>(0.021)                  | <0.001 | 0.227<br>(0.095)                         | <0.001 |
| Some problems in Pain/Discomfort                                  | 0.018<br>(0.017)                        | 0.286  | 0.016<br>(0.018)             | 0.38   | 0.032<br>(0.013)                  | 0.016  | 0.079<br>(0.076)                         | <0.001 |
| Severe problems in Pain/Discomfort                                | 0.313<br>(0.178)                        | <0.001 | 0.325<br>(0.019)             | <0.001 | 0.329<br>(0.020)                  | <0.001 | 0.382<br>(0.109)                         | <0.001 |
| Some problems in Anxiety/Depression                               | 0.022<br>(0.018)                        | 0.229  | 0.019<br>(0.02)              | 0.326  | 0.050<br>(0.014)                  | <0.001 | 0.019<br>(0.090)                         | 0.257  |
| Severe problems in Anxiety/Depression                             | 0.157<br>(0.018)                        | <0.001 | 0.161<br>(0.019)             | <0.001 | 0.163<br>(0.020)                  | <0.001 | 0.177<br>(0.097)                         | <0.001 |
| Constant                                                          | 0.055<br>(0.024)                        | 0.026  | 0.053<br>(0.026)             | 0.044  | 0.037<br>(0.012)                  | 0.002  | -                                        | -      |
| Included uncensored (cTTO) left-censored (cTTO) dichotomous (DCE) | 3,000<br>2,789<br>211<br>-              |        | 3,000<br>2,789<br>211<br>-   |        | 3,000<br>2,789<br>211<br>-        |        | -<br>-<br>-<br>3,000                     |        |
| Ordering of dimensions (cumulative)                               | MO-PD-SC-UA-AD                          |        | MO-PD-SC-UA-AD               |        | MO-SC-PD-UA-AD                    |        | MO-PD-UA-SC-AD                           |        |
| Estimated values by health state                                  |                                         |        |                              |        |                                   |        |                                          |        |
| the best state (11111)                                            | 0.945                                   |        | 0.947                        |        | 0.963                             |        | 1                                        |        |
| the worst state (33333)                                           | -0.46                                   |        | -0.518                       |        | -0.56                             |        | -0.447                                   |        |
| Model performance                                                 | 2                                       |        | 2                            |        | 1                                 |        | 1                                        |        |

<sup>1</sup> Coefficients were rescaled using the Theta parameter estimated in the standard hybrid model.

|                 |              |                |                |         |
|-----------------|--------------|----------------|----------------|---------|
| non-significant | 0            | 0              | 0              | 0       |
| inconsistency   | <u>3,013</u> | 3,633          | 3,142          | 2,769   |
| AIC             | <u>3,091</u> | 3,711          | 3,274          | 2,836   |
| BIC             | 0.04817      | 0.04486        | <u>0.04380</u> | 0.05741 |
| MAE             | 0.05555      | <u>0.05464</u> | 0.05756        | 0.07983 |
| RMSE            |              |                |                |         |

AD anxiety/depression, AIC Akaike information criteria, BIC Bayesian information criteria, cTTO composite time trade-off, DCE discrete choice experiment, MAE Mean Absolute Error, MO mobility, PD pain and discomfort, RMSE Root Mean Square Error, SC self-care, SE standard error, UA usual activities DCE rescaled
