# Supplementary material for: Valuation of the EQ-5D-3L in Russia
Source: Springer Nature journal article supplement (doi:10.1007/s11136-021-02804-6), 2021-03-13
Supplement: MOESM2 [file 18963180]

## **Title: Valuation of the EQ-5D-3L in Russia**

Vitaly Omelyanovskiy<sup>1,2,3</sup>, Ph.D.

Nuriya Musina<sup>1,4,5</sup>, Ph.D.

Svetlana Ratushnyak<sup>1</sup>, M.Sc

Tatyana Bezdenezhnykh<sup>1,2</sup>, M.Sc

Vlada Fediaeva<sup>1,2</sup>, M.Sc

Bram Roudijk<sup>6</sup>, Ph.D.

Fredrick Dermawan Purba<sup>7,8</sup>, Ph.D.

1. Center of Healthcare Quality Assessment and Control, Ministry of Health of the Russian Federation, Moscow, Russia
2. Financial Research Institute at the Ministry of Finances of Russian Federation, Moscow, Russia
3. Russian Medical Academy of Continuous Professional Education of the Ministry of Health of the Russian Federation, Moscow, Russia
4. Russian Presidential Academy of National Economy and Public Administration (RANEPA), Moscow, Russia
5. Saint Petersburg State Chemical Pharmaceutical Academy, St. Petersburg, Russia
6. EuroQol Research Foundation, Rotterdam, the Netherlands
7. Faculty of Psychology, Universitas Padjadjaran, Jatinangor, Indonesia
8. Center for Health Technology Assessment, Universitas Padjadjaran, Jatinangor, Indonesia

### **Corresponding author**

Svetlana Ratushnyak

Email: [svetlanarshk@gmail.com](mailto:svetlanarshk@gmail.com)

**Word count:** 3666 words (including table and figures captions)

Table 2. Russian EQ-5D-5L crosswalk value set

| Dimensions with levels |   |                                         | Russian EQ-5D-5L crosswalk value set |
|------------------------|---|-----------------------------------------|--------------------------------------|
| Mobility               | 2 | Slight problems in Mobility             | 0.034                                |
|                        | 3 | Moderate problems in Mobility           | 0.041                                |
|                        | 4 | Severe problems in Mobility             | 0.071                                |
|                        | 5 | Unable to walk                          | 0.458                                |
| Self-Care              | 2 | Slight problems in Self-Care            | 0.062                                |
|                        | 3 | Moderate problems in Self-Care          | 0.075                                |
|                        | 4 | Severe problems in Self-Care            | 0.117                                |
|                        | 5 | Unable to wash or dress                 | 0.246                                |
| Usual Activities       | 2 | Slight problems in Usual Activities     | 0.059                                |
|                        | 3 | Moderate problems in Usual Activities   | 0.073                                |
|                        | 4 | Severe problems in Usual Activities     | 0.129                                |
|                        | 5 | Unable to do usual activities           | 0.242                                |
| Pain/Discomfort        | 2 | Slight problems in Pain/Discomfort      | 0.053                                |
|                        | 3 | Moderate problems in Pain/Discomfort    | 0.066                                |
|                        | 4 | Severe problems in Pain/Discomfort      | 0.190                                |
|                        | 5 | Extreme problems in Pain/Discomfort     | 0.377                                |
| Anxiety/Depression     | 2 | Slight problems in Anxiety/Depression   | 0.033                                |
|                        | 3 | Moderate problems in Anxiety/Depression | 0.041                                |
|                        | 4 | Severe problems in Anxiety/Depression   | 0.109                                |
|                        | 5 | Extreme problems in Anxiety/Depression  | 0.179                                |
